# Supplementary material
Source: PubMed Central journal article supplement (PMC4163106)
Supplement: NIHMS619797-supplement-01.pdf [file NIHMS619797-supplement-01.pdf]

**The RNA-binding protein DDX1 promotes primary microRNA maturation and inhibits  
ovarian tumor progression**

Cecil Han, Yunhua Liu, Guohui Wan, Hyun Jin Choi, Luqing Zhao, Cristina Ivan, Xiaoming He,  
Anil K. Sood, Xinna Zhang, Xiongbin Lu

**Inventory of Supplemental Information**

- **Figures S1-S7**
- **Figures S1-S7 Legends**
- **Table S1-S2**
- **Supplemental Experimental Procedures**
- **Supplemental References**

Figure S1

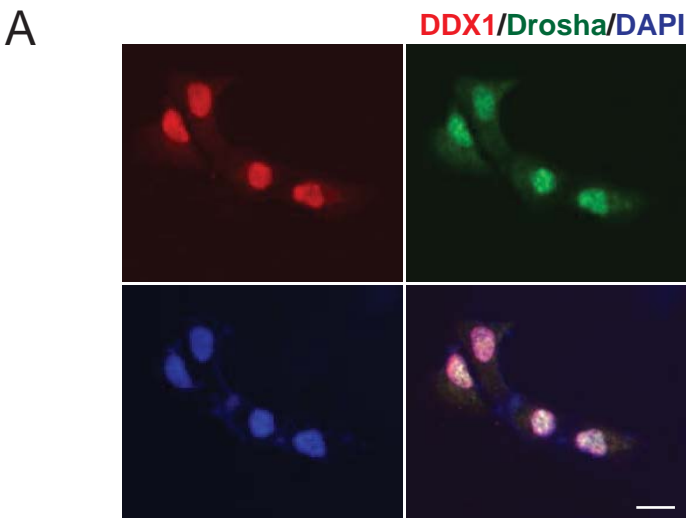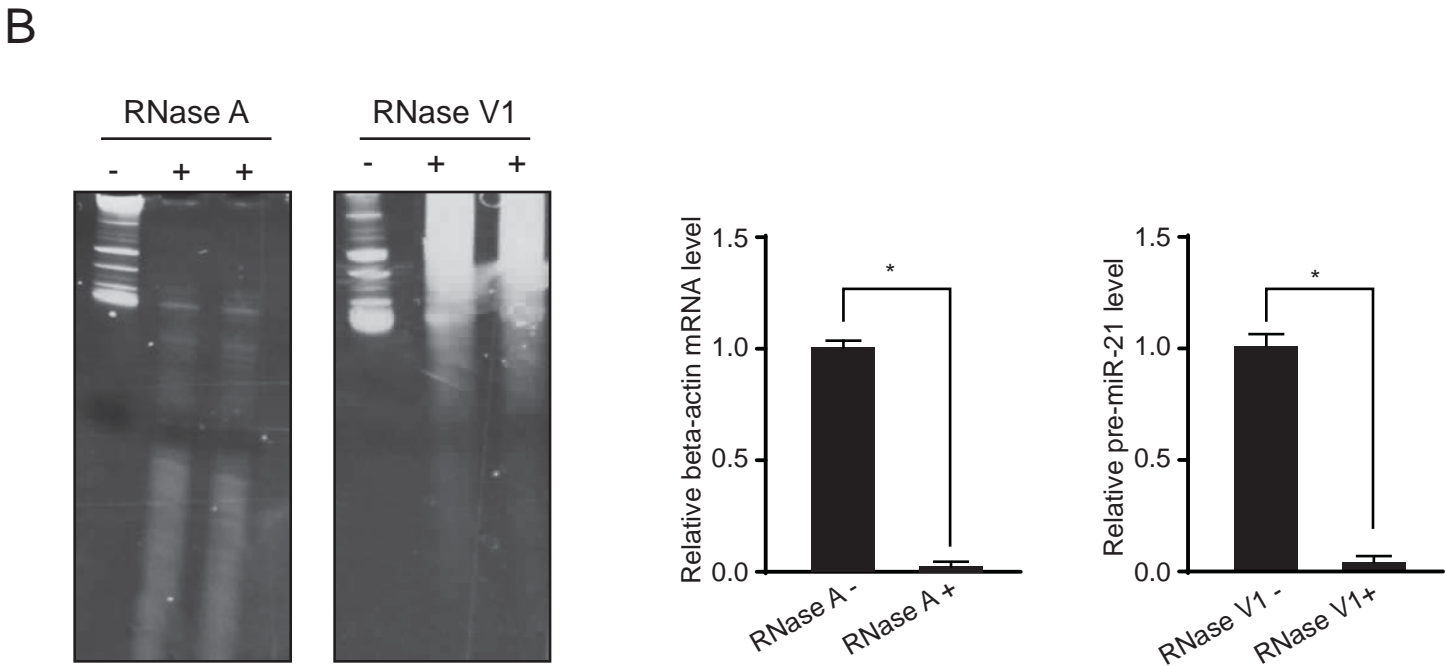

Figure S2

A

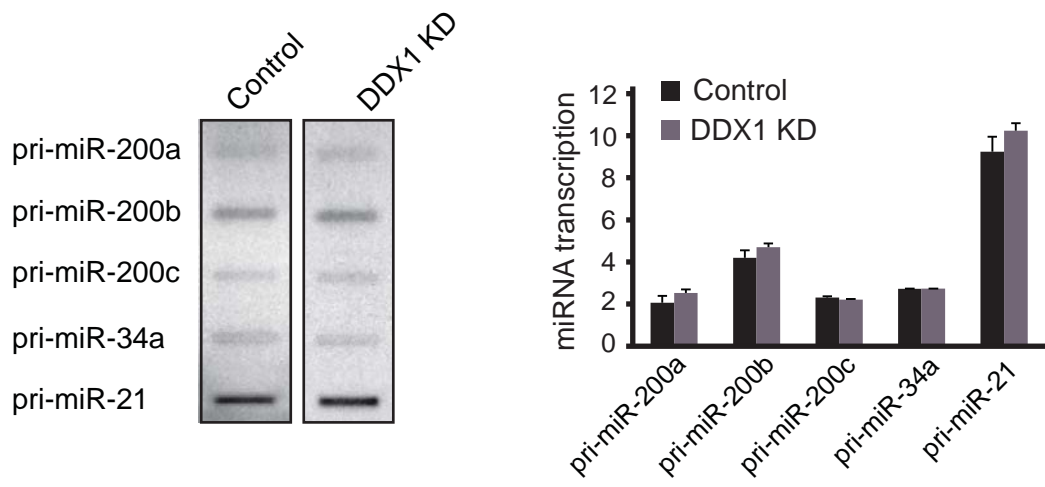

B

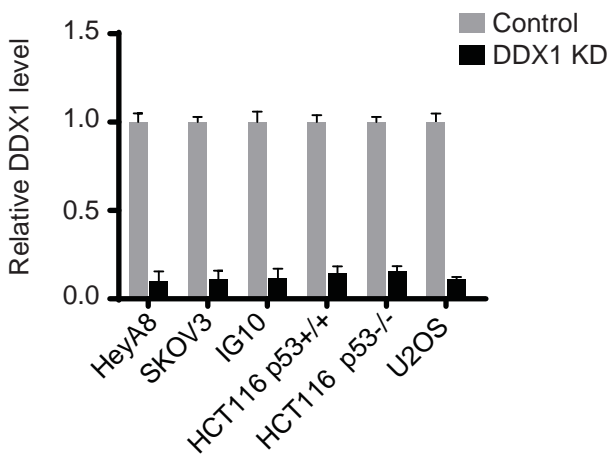

C

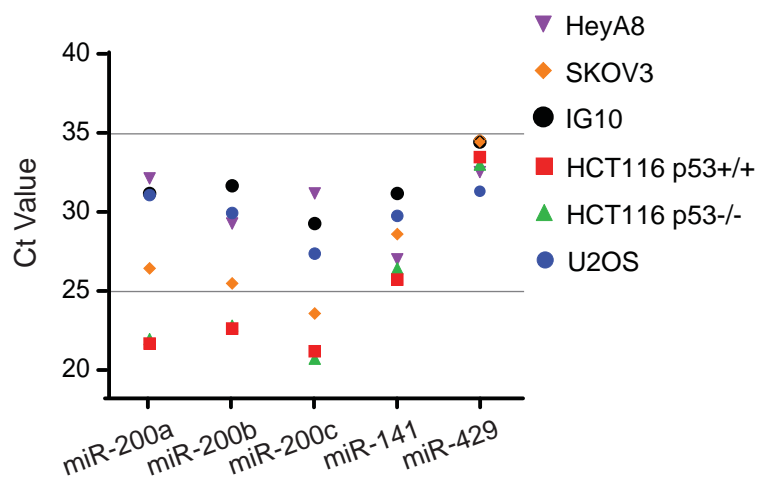

D

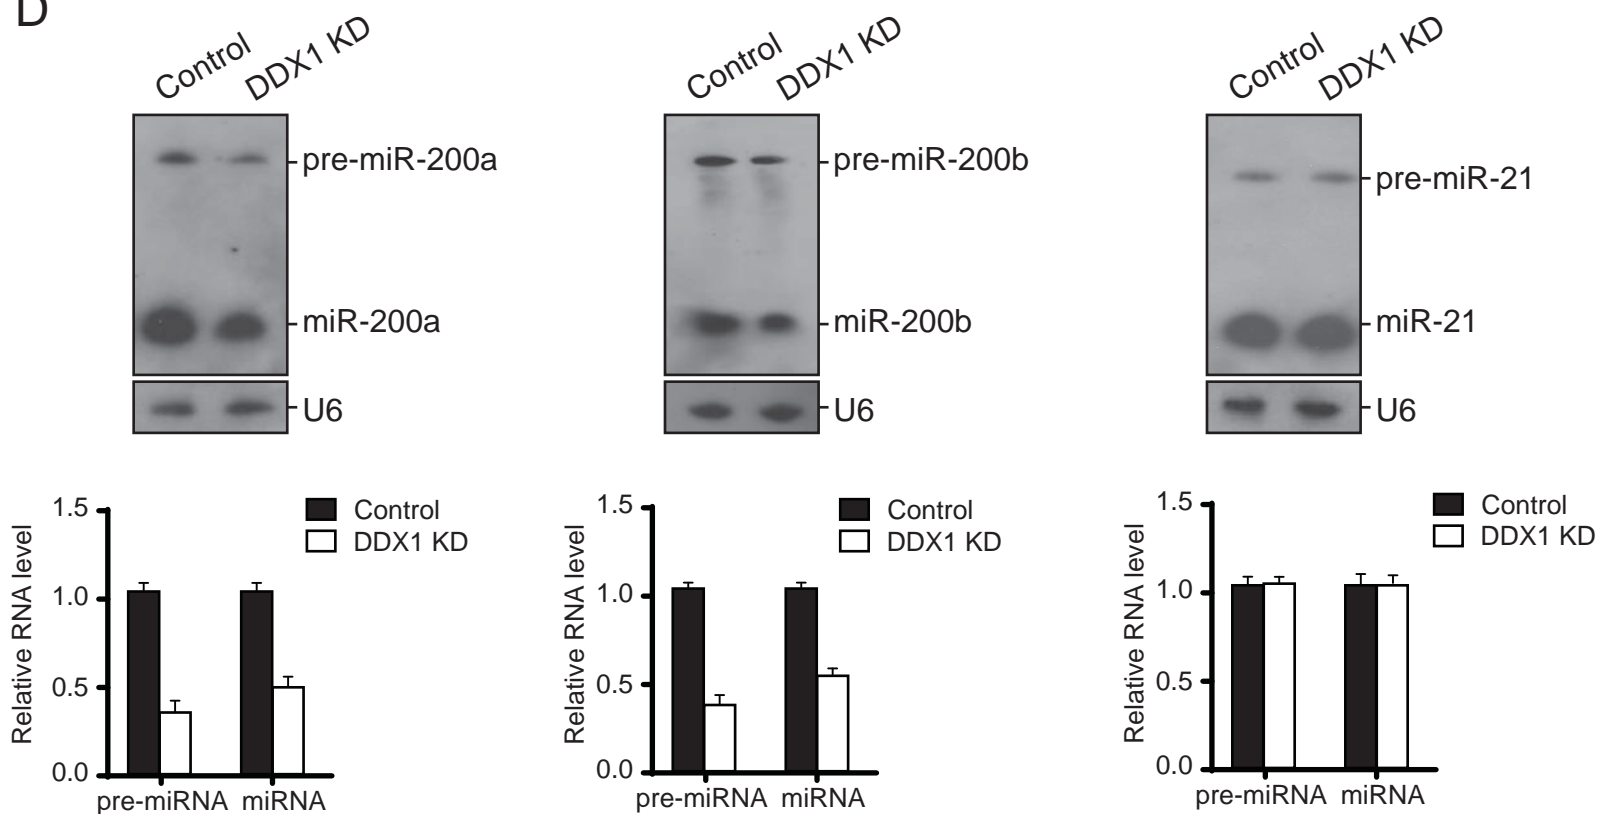

# Figure S3

**A**

DDX1-shRNA1 : CAGATGGTCTTTGTTGTCA  
 DDX1-shRNA2: AGATGGTCTTTGTTGTCAA

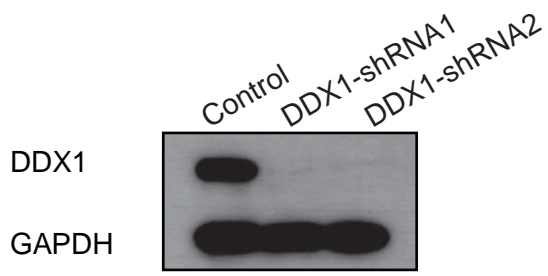

**B**

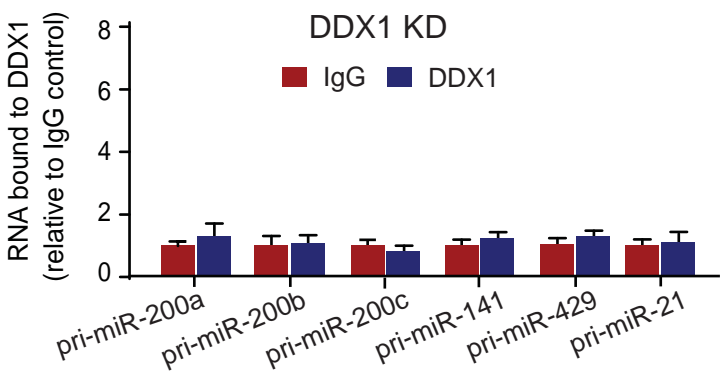

**C**

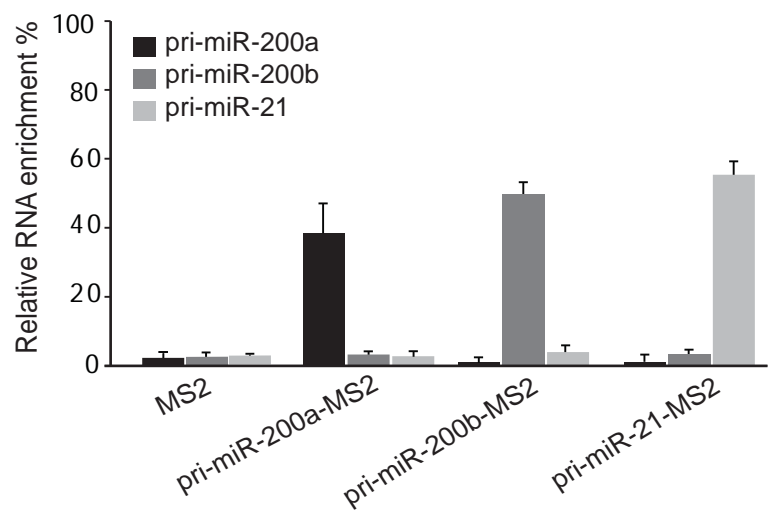

**D**

In vivo processing of primary miRNAs

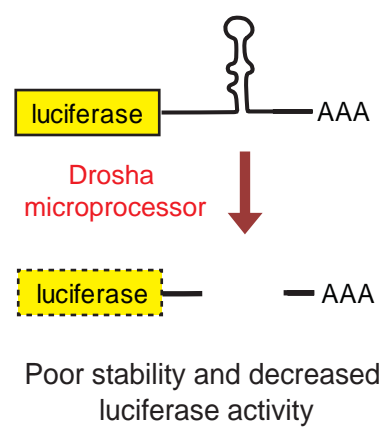

**E**

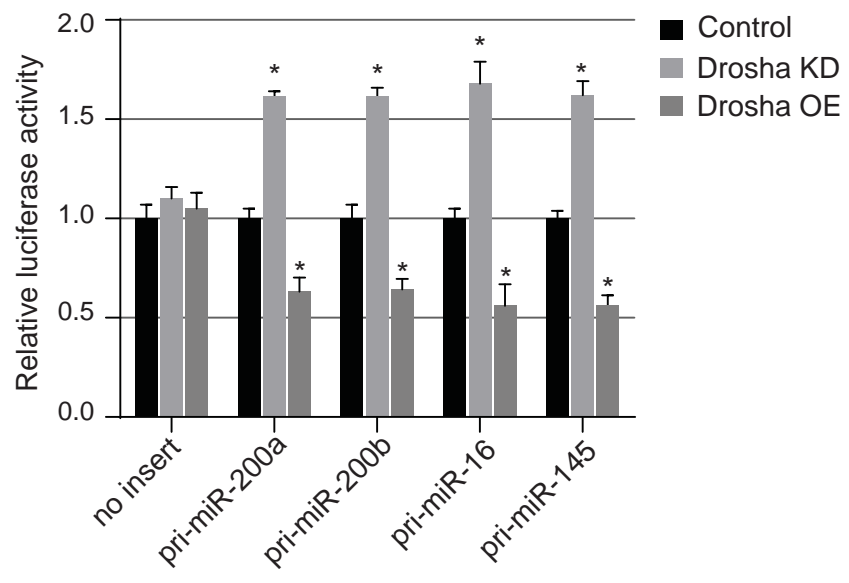

Figure S4

A

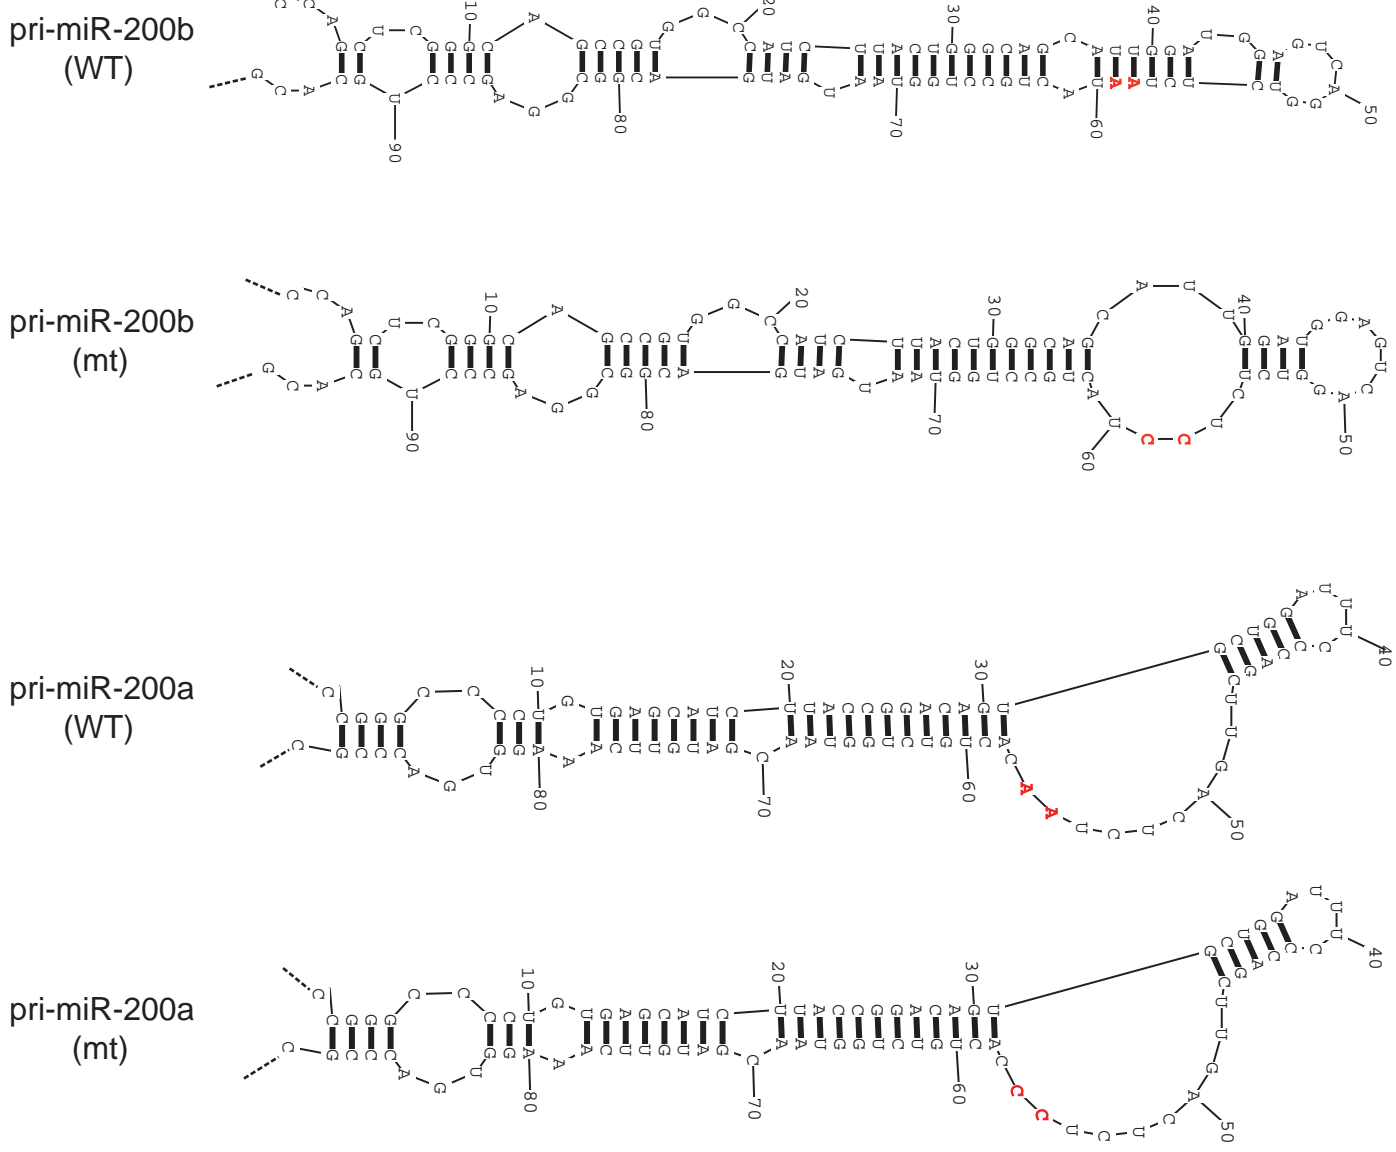

B

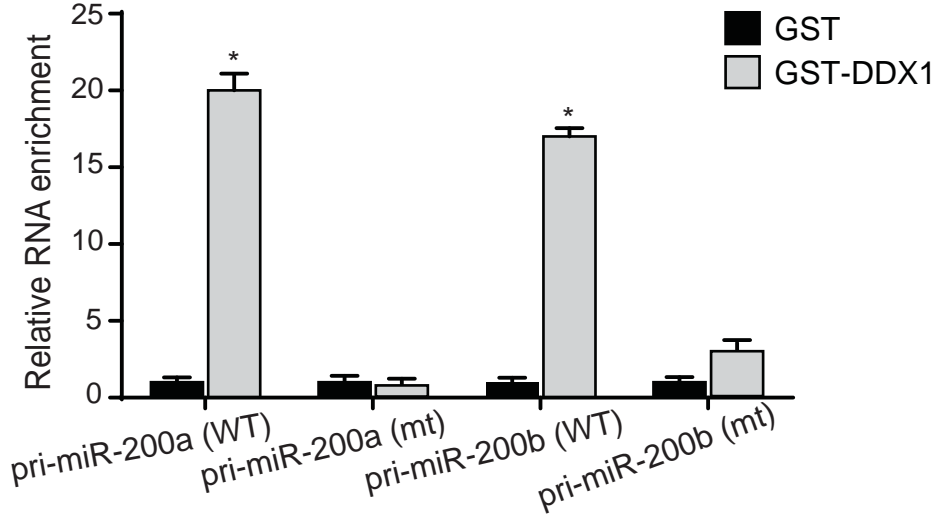

Figure S5

A

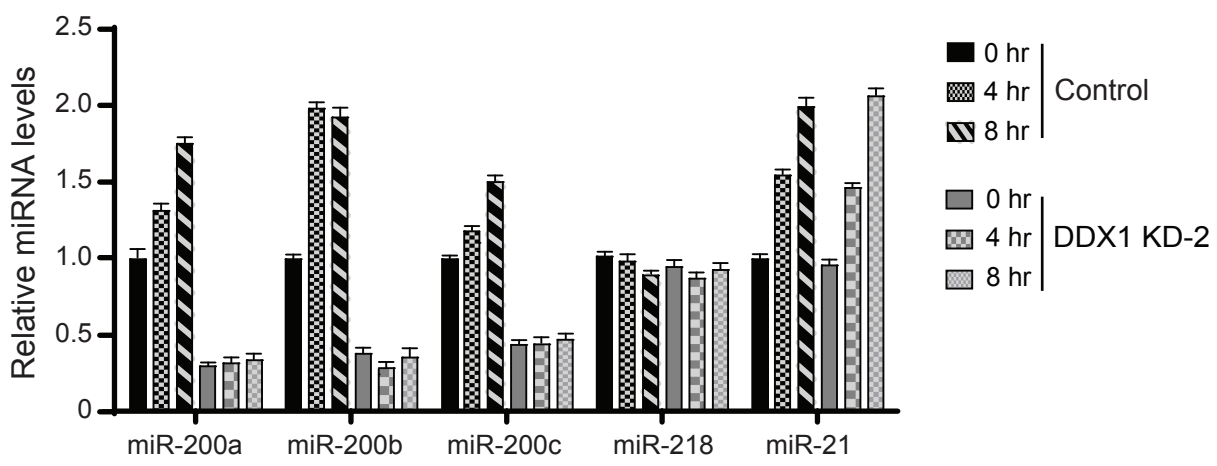

B

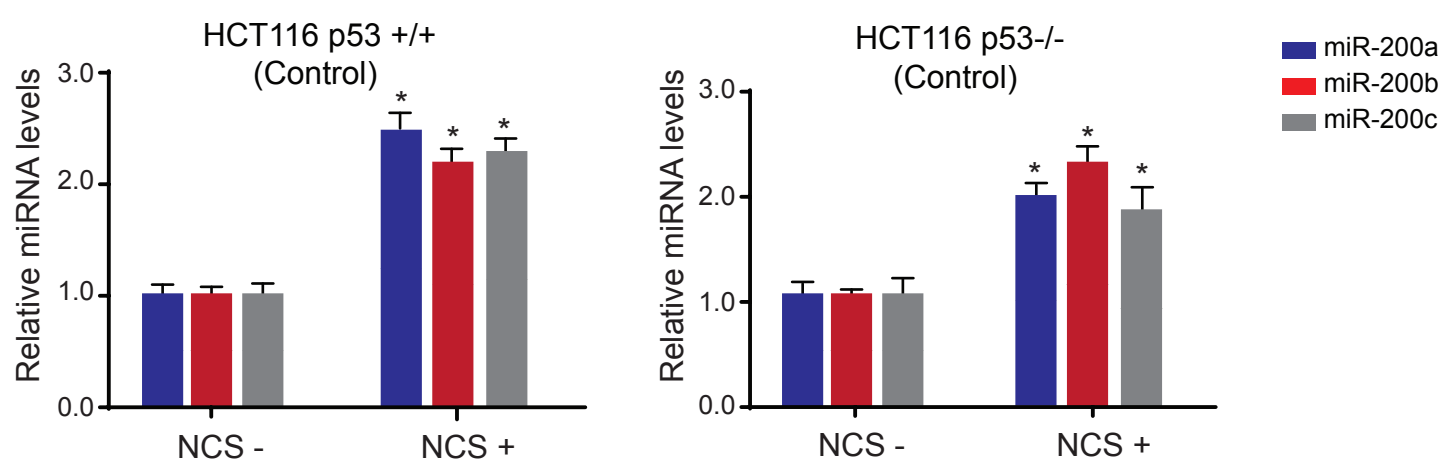

C

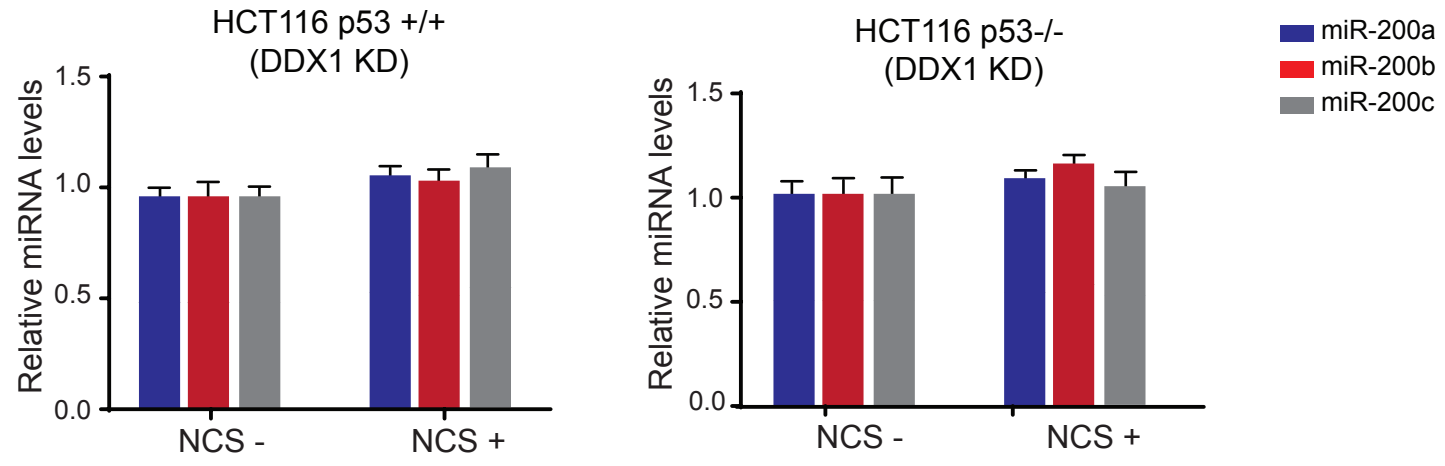

D

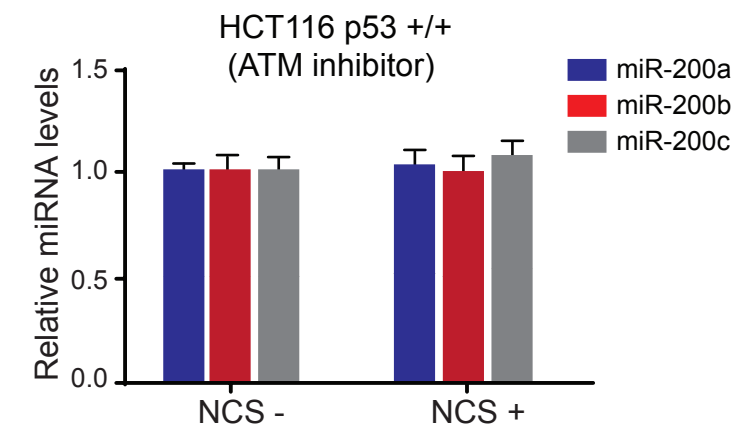

Figure S6

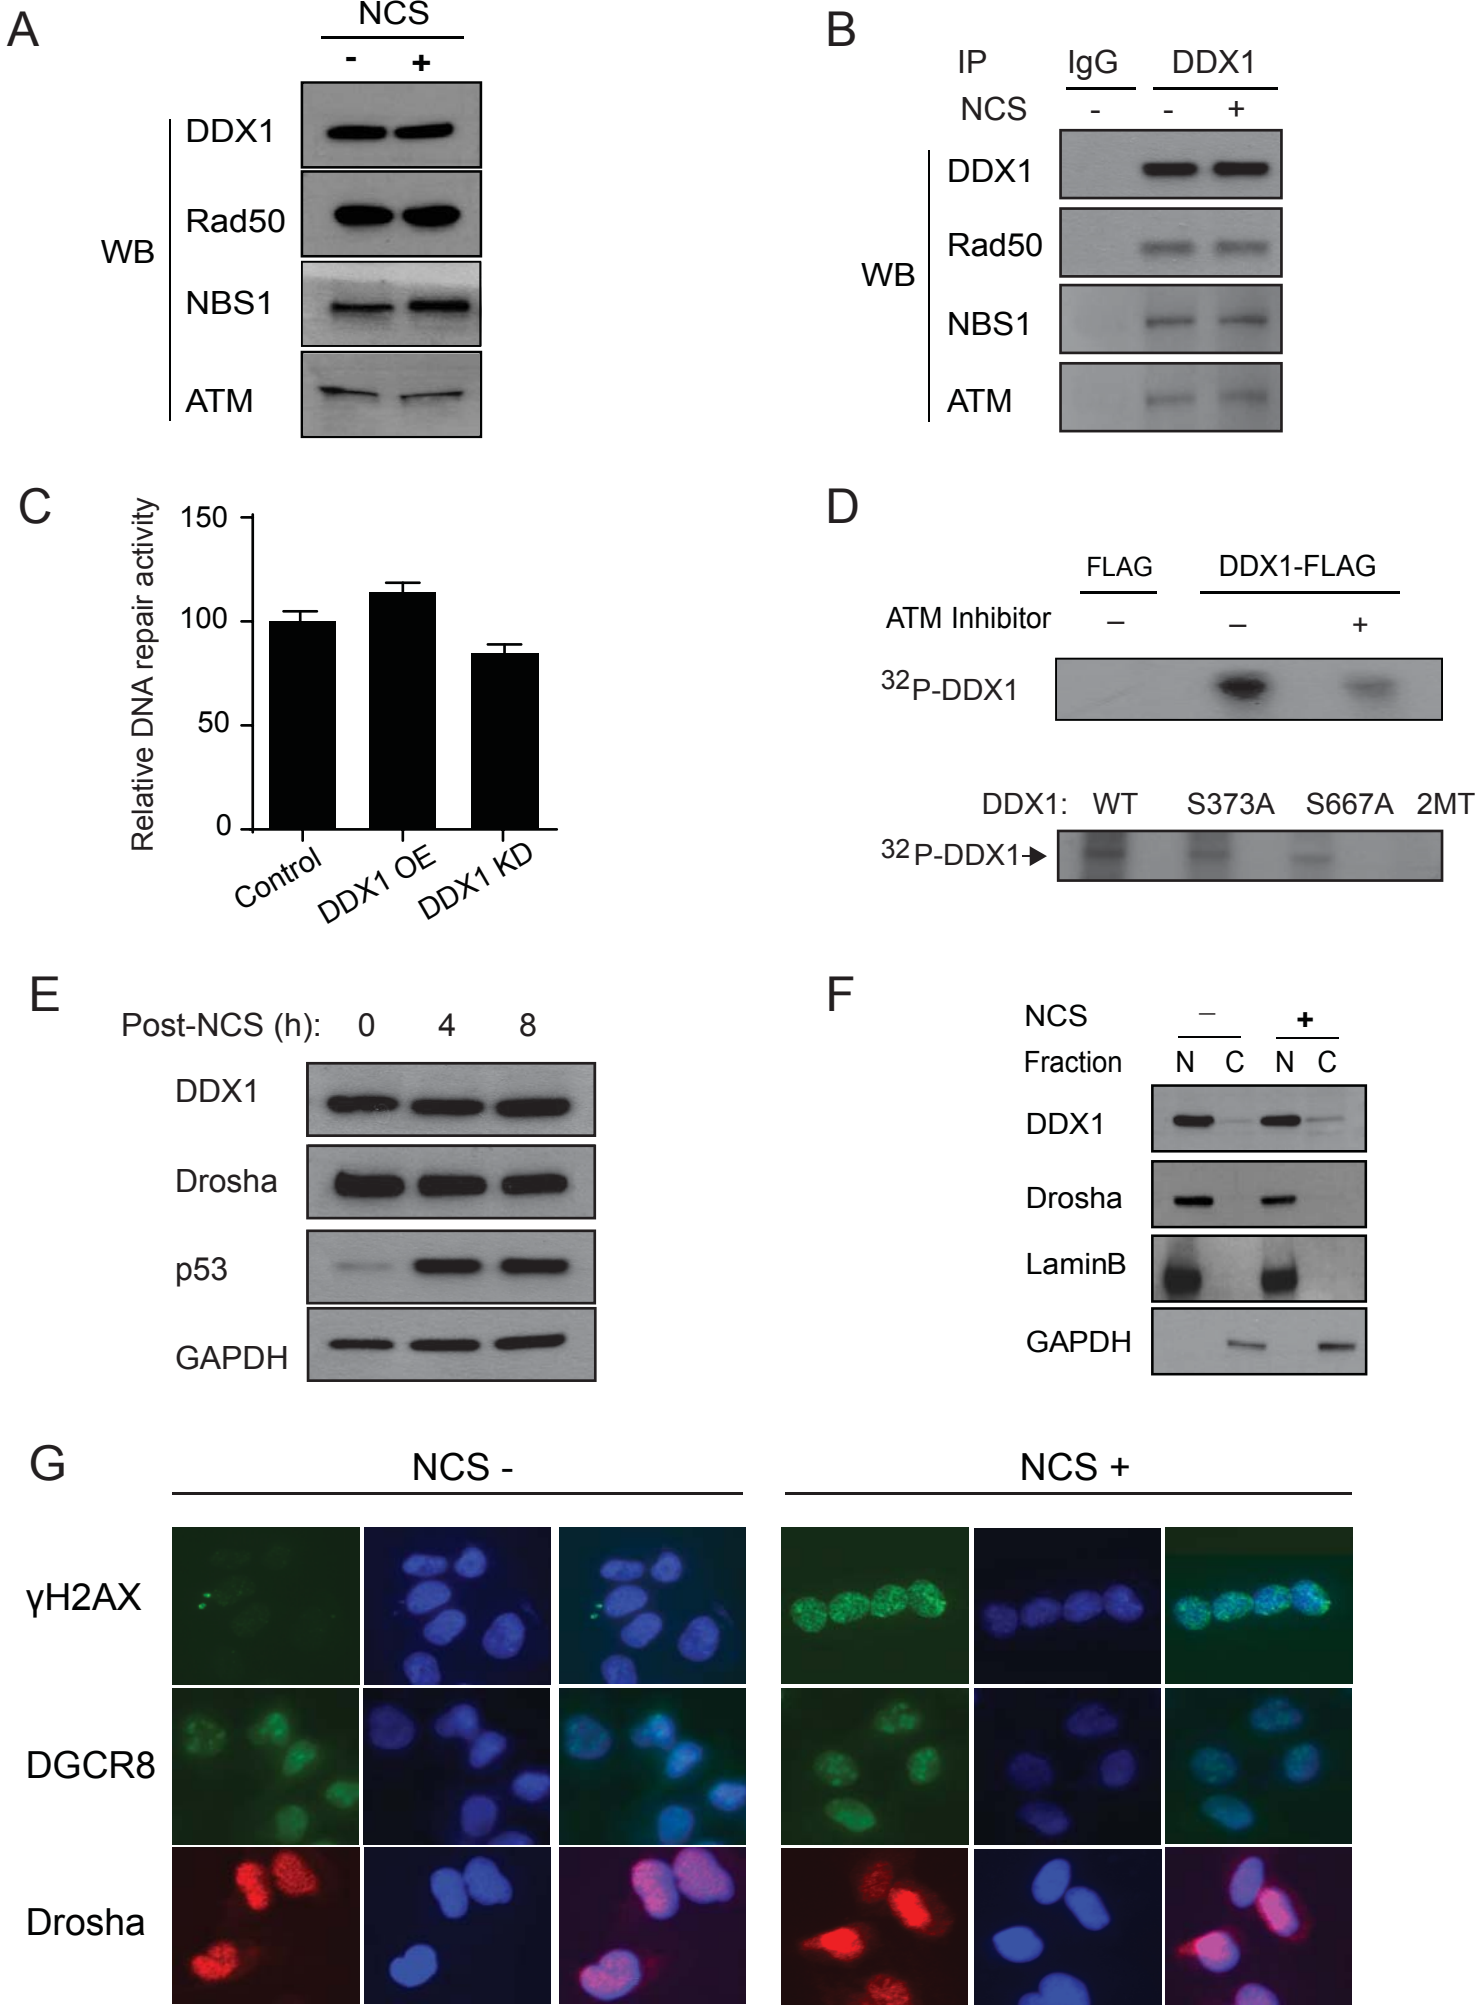

Figure S7

A

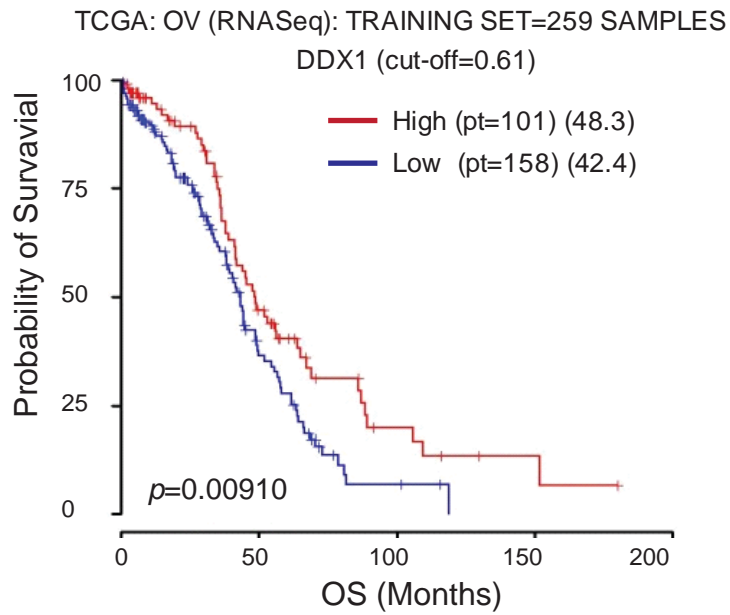

B

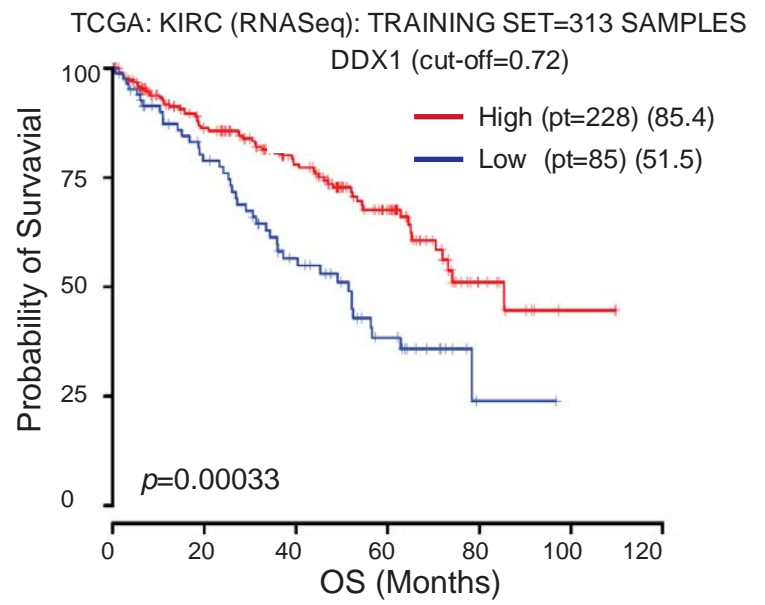

C

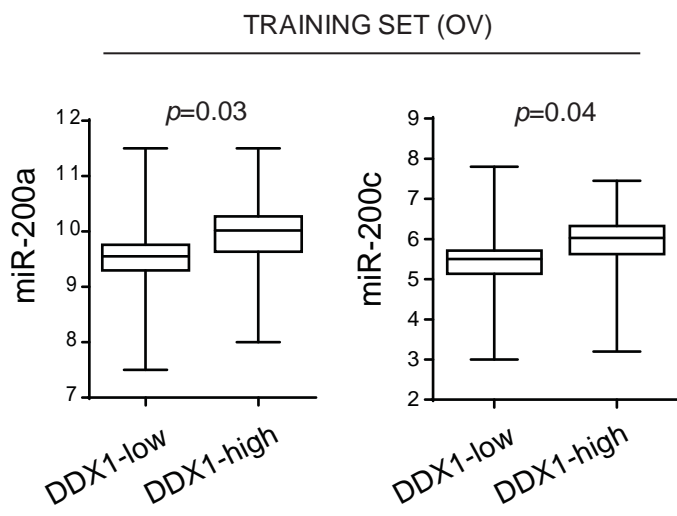

D

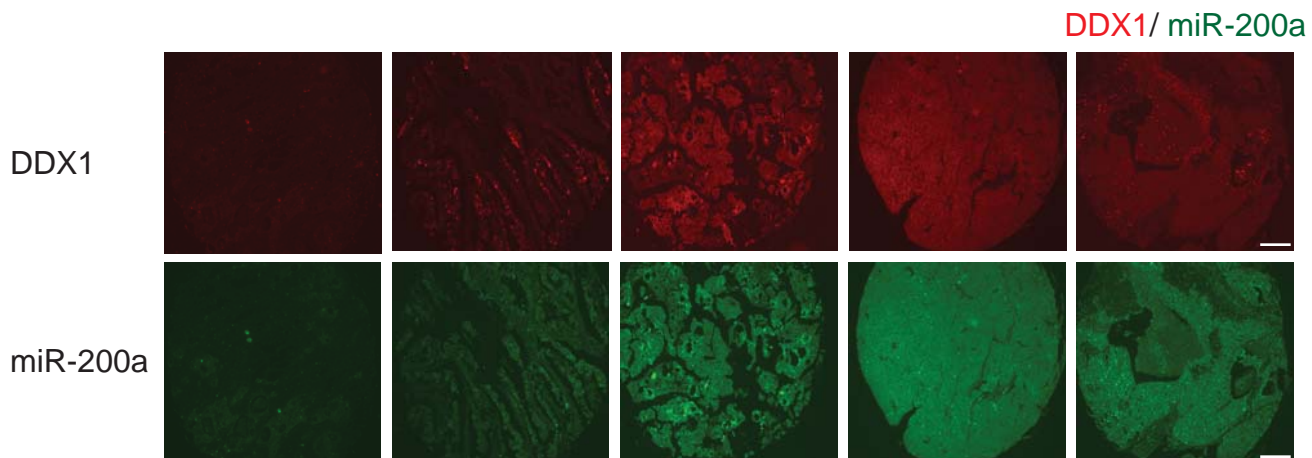



## SUPPLEMENTAL FIGURE LEGENDS

**Figure S1 (related to Figure 1). DDX1 interacts with the Drosha microprocessor.** (A) Co-localization of DDX1 and Drosha in human U2OS cells. Scale bar: 10 $\mu$ m. (B) RNase activity was determined by incubating total RNA with 0.1 unit of RNase A or RNase V1 for 30 min. Integrity of RNA was observed by gel separation and ethidium bromide staining (two left panels). RNA degradation was evaluated by reduced levels of  $\beta$ -actin mRNA (single-stranded RNA) or pre-miR-21 (double-stranded RNA). \*  $p < 0.05$ .

**Figure S2 (related to Figure 2). Posttranscriptional regulation of the DDX1-dependent miRNA expression.** (A) Transcription of the DDX1-dependent miRNA genes in control and DDX1-knockdown cells in nuclear run-on assays. Pri-miR-34a and pri-miR-21 were used as DDX1-independent miRNA controls. Quantification of transcription activities were shown on the right. (B) Efficiency of DDX1 knockdown in various cell lines. GAPDH levels were used for normalization. (C) CT (cycle threshold) values of DDX1-dependent miRNAs in qPCR assays. (D) Effect of DDX1 on miRNA processing. Northern blotting was performed to determine the levels of pre-miRNAs and mature miRNAs in total RNAs purified from control and DDX1-knockdown cells. U6 RNA was used as a loading control. Band intensity was quantified with Image J.

**Figure S3 (related to Figure 3). DDX1 physically binds pri-miR-200s and promotes their processing.** (A) Knockdown efficiency of two DDX1 shRNAs. (B) To test the specificity of DDX1 RIP assay, levels of pri-miRNAs were measured in the DDX1 immunoprecipitates of DDX1-knockdown cells. Control IgG immunoprecipitates were used as negative controls. No significant differences were observed for pri-miRNA levels in the control or DDX1-knockdown

immunoprecipitates. (C) Immunoprecipitation of MS2-pri-miR-200a, MS2-pri-miR-200b and MS2-pri-miR-21 in MS2-TRAP assays. Pri-miRNA levels were measured by RT-qPCR. (D) Schematic diagram for in-vivo pri-miRNA processing assay. (E) In-vivo pri-miRNA processing activity is dependent on Drosha. Firefly luciferase signals were normalized by internal control Renilla luciferase readings and are shown as fold changes in comparison with luciferase control vector without pri-miRNA insert. Error bars represents the mean  $\pm$  SD, \*  $p < 0.05$ .

**Figure S4 (related to Figure 3). DDX1-binding requirements in pri-miR-200s.** (A) Predicted structures of pri-miR-200a and pri-miR-200b. WT (wildtype) and mt (mutant) forms of pri-miR-200a/b are shown. Two A residues in or near the loops of the pre-miRNAs are conserved in most of the DDX1-dependent miRNAs (Table S1). (B) Mutating the AA di-nucleotides to CC in pri-miR-200a/b abolished their interaction with DDX1. \*  $p < 0.05$ .

**Figure S5 (related to Figure 4). DNA damage-induced miR-200 expression is independent of p53.** (A) Levels of miR-200a/b/c were induced after NCS (500 ng/ml) treatment in control U2OS cells, but not in the DDX1-knockdown U2OS cells using DDX1 shRNA-2. miR-218 and miR-21 were used as DDX1-independent controls. (B) Levels of miR-200a/b/c in HCT116 p53<sup>+/+</sup> and HCT116 p53<sup>-/-</sup> cells treated with or without NCS (500 ng/ml, 4 h) (\*  $p < 0.05$ ). (C) Levels of miR-200a/b/c in the DDX1-knockdown HCT116 p53<sup>+/+</sup> and HCT116 p53<sup>-/-</sup> cells treated with or without NCS (500 ng/ml, 4 h). (D) Levels of miR-200a/b/c in HCT116 p53<sup>+/+</sup> cells treated with NCS (500 ng/ml) and ATM inhibitor (10  $\mu$ M of CGK733).

**Figure S6 (related to Figure 5). Interaction between DDX1 and the Drosha complex is unchanged after DNA damage.** (A) Protein levels of DDX1, Rad50, NBS1 and ATM are unchanged after NCS treatment (500 ng/ml, 4 h). (B) Interactions of DDX1 with Rad50, NBS1

and ATM are unchanged after NCS treatment. (C) Homologous recombination DNA repair activity is only minimally affected by DDX1. (D) DDX1 is phosphorylated in vivo. DDX1-overexpressing HEK293T cells were treated with or without ATM inhibitor (10  $\mu$ M, CGK733) and phosphorylated proteins were labelled with  $^{32}$ P-ATP. In vivo phosphorylation of wildtype and phosphorylation-mutant DDX1 (single or double sites) was shown at the bottom. (E) Protein levels of DDX1 and Drosha are unchanged throughout 0-8 h post-NCS treatment. p53 and GAPDH were used as positive and negative controls for DNA damage signalling, respectively. (F) Subcellular distributions of Drosha and DDX1 are unchanged after DNA damage (500 ng/ml NCS, 4 h). Lamin B and GAPDH were used as biomarkers for nuclear and cytoplasmic proteins, respectively. (G) Localization of Drosha and DGCR8 was unchanged after DNA damage (500 ng/ml NCS, 4 h). No distinct foci were observed for either Drosha or DGCR8 following DNA damaging treatment.

**Figure S7 (related to Figure 7). DDX1 levels are associated with clinical outcome of cancer patients.** (A) Kaplan-Meyer plots for overall survival of patients with ovarian serous adenocarcinoma in the training cohort (n = 259). (B) Kaplan-Meyer plots for overall survival of patients with kidney renal clear cell carcinoma (n = 313). (C) Relative expression levels of miR-200a ( $p = 0.03$ ) and miR-200c ( $p = 0.04$ ) in the DDX1-low and -high groups from the training cohort of ovarian serous adenocarcinomas. (D) Representative images for DDX1 and miR-200a levels in human ovarian tumor tissue microarray (Biomax, BC110118,). DDX1 levels are correlated with miR-200a levels. Scale bar: 200  $\mu$ m.

**Table S1.** Alignment of DDX1 dependent pre-miRNAs using Clustal W.

Color scale: 0 (blue) to 130 (red)

Vertical bar: 0 to 30 (miRNA positions)

Horizontal axis: 0 to 130 (nucleotide positions)

Sequence alignment (nucleotide positions 0-130):

```

0 ..... X-CTXTGGGGTCGTTAICCTTIGTATGGTGGC... TTTTATTTATG... ACTAACTCCTATAGTAAACXITXXITTTTTCAGTXXXXXXXXXXXXXXXXXXXX
10 ..... TACTTGAAGAGAA GTTGTTCGTGGTGGATTCGC-- TTT-AC TTTATG- ..... ACGAATCATTCCAGGCAACACACTTTTTT- CAGTA
20 ..... TGGCCGATTTTGGCACTAGCACATTTTGGTGTGC- - TCTCCGCTG- ..... AGCAATCATGTGCA GTGCCAATATGGGAAA
30 ..... TGCCCTGGCTCAGTTATCACAGTGTGATGCT- - - GTCATTTAAAGGTACAGTACTGTGATAACTGAAGATGGCA
40 ..... GGATCTTTTTGGGCTGGGCTTGGCTTGGCTTCAACAGTGTGAGGAGCCCTTACCCCAAAAAGTATCT
50 ..... CCTGGCATGGTGTGGTGGGCAAGCTG- GTGTTGTAATCAGGCCGTTGCCAATCAGAAAGCCCTTACCCCAAAAAGTATCT
60 ..... CGGCCGGCCCTGGGTCCATCTTCCAGTACAGTGTGGATGGTCTAATTGTGAAG- CTCTTAACTGTGTGTTAAAGTGGCTCCCGGTTGGGTTTCC
70 ..... CCTGGCACTGAGAACTGAATCCATAGGC- - TGTGAAGCTCT- ..... AGCAATGCCCTGTGAACTCAGTTCGGTGGCCCGG
80 ..... CTGTTAATGCTAATCCTGTAAGGGGTTTTGGCTCCAA- - - CTGACTCCTCATATAGCAATTAACAAG
90 ..... CCGGGCCCTGTGA- - GCATCTTACCGGACAGTGGTGGATTTCCAGCTTGA- - - CTCTAACTGTCTGGTAACTGATTTCAAAGGTGACCCCGC
100 ..... CCAGGCTCGGGCAGCCGCTGG- - CCATCTTACTGGGACGACTT- G- GATGGAGTCAAG- - - TCTCTAACTGGCTGGTAACTGATGACGGCGGAGCCCTGGCAGC
110 ..... CCC- - TCGTCTTACCCAGCAGTGTGG- - GGTGGGTTGGGA- G- TCTCTAACTGCCGGGTAACTGATGGAGG
120 ..... AAAAGGTGGATTTCCCTCTATGTTTTAT- - - GTT- ATTTATG- - - - GTTAAACATAGAGGAAATTCACCGTTTT
130 ..... TAAAAGGTAGATTTCCCTCTATGATGAC- - - ATT- ATTTATG- - - - ATTAATCATAGAGGAAATTCACCGTTTT- C
140 ..... GGTACCTGAGAGAGGTTGTGTGATGAGTTGCG- - - TTTTATG- - - - ACGAATATAACACAGATGGCTGTGTTT- - - CAGTACC
150 ..... CGCCGGCCGATGG- - CGCTCTTACCAACACATGGTTAG- - - ACCTGGCCCTC- - - TGCTTAACTGTCTGTTAAACCTCCATCCGCTGC
160 ..... CTGTGTGTGATGAGCTGGCAGTGTATTTGTTAGCTGGTGGATATGTGAATCGGCTAACATGGCAACTGCTGCTTTATTGGATA- TACA
170 ..... TTGGTACTTTGGAGAGTGGTTATCCCTGTCTGTTGCT- - - TTT- GCTCATG- - - - TCGAATCGTACAGGGTCCACCTTTTT- CAGTATCAA
180 ..... TGGTACTTGGAAAGTTCATTTGTCAGACCATGGATCTCCAGGTG- GGTCAA GTTTAGAGATGCACCAACC- - TGGAGGACTCCATGCTGTTGAGCTGTTCAACAAGCAGCGGACACTTC
190 ..... TGGTACCTGAAAAGAAATTTGCCCATGTTATTTTCGC- - - TTT- ATATGTG- - - - ACBAAACAACATGGTGCACCTTTTTT- CCGTATCA
200 ..... CCTGTGCCCTTGGGCGGGGCGCTGTTAA GACTTTGCA GTGATGTTTAA CTCCTCTCCAGTGGAACTCA- - CAGCAAAGT- - - CTGTGCTGCTTCCGTCCTCA CGCTGCCCTGGGAGGGGT
210 ..... TCTCAGGCTGTGACCTCTAGGGGAAAGC- - - GCTTTCTGTTG- - - - GCTAAAAGAAAAGAAAGCGGCTTCCCTTCAAGTGTAAACGCTTTGAGA
220 ..... TCTCATGCTGTGACCTCAAGGGGAAAGC- - - ACTTTCTCTG- - - - TCCAAAAGAAAAGAAAGCGGCTTCCCTTTGGAGTGTTA- CCGTTTTGAGA
230 ..... ATACTTGGAGGAAATATCCTTGGTGTGTTCCG- - - TTT- ATTTATG- - - - ATGAACTACAAGGCAATTTCTTTTT- GAATAT
240 ..... CAGATCTCAGACATCTGGGGATCATCATGTCCAGGATAACAGT- - - GTGCACTTTGTGACA- - GATTTGATTAATAAGGGTCTGGGAGCCACTCATTTCA
250 ..... TAGCCA GTCAAAAATGAGGCTTATTCATAAAGTGCAGTATGGTGAAGTCAATCTGTGAAATT- - TTAGTATAAGCTAGTCTGATTGAAAACATGCAAGCA

```

miR-82  
miR-96  
miR-101  
miR-129  
miR-138  
miR-141  
miR-146b  
miR-155  
miR-200a  
miR-200b  
miR-200c  
miR-376  
miR-376a  
miR-410  
miR-429  
miR-449a  
miR-487b  
miR-490  
miR-495  
miR-499  
miR-518e  
miR-524  
miR-539  
miR-542  
miR-590

**Table S2.** Primers for mature miRNAs in qRT-PCR assays were obtained from Exiqon: U6 RNA control (#201510), miR-200a (#204707), miR-200b (#204650), miR-200c (#204482), miR-141 (#204504), miR-429 (#205068), miR-21 (#204230), miR-10a (#204778). Other primers specific for qRT-PCR are listed below.

|                       |                         |
|-----------------------|-------------------------|
| pri-miR-21- forward   | TTTTGTTTTGCTTGGGAGGA    |
| pri-miR-21- reverse   | AGCAGACAGTCAGGCAGGAT    |
| pri-miR-10a- forward  | CGGAAAGTAGGAGAACTGGA    |
| pri-miR-10a- reverse  | CAGAAAAATACTACATATAC    |
| pri-miR-200a- forward | GATGCAAGGGTCAGAAGGGC    |
| pri-miR-200a- reverse | GAGCCATCTGGCCCGGACG     |
| pri-miR-200b- forward | CTGGCGGGACCCACGTC       |
| pri-miR-200b- reverse | TGCCTCGGTGGTGTCCCCG     |
| pri-miR-200c- forward | CCTGGGCCTGAAGCTGCCT     |
| pri-miR-200c- reverse | GGCGATGGATGTTGCTGAC     |
| pri-miR-141- forward  | GAGCGCGCACCGTAGTTCT     |
| pri-miR-141- reverse  | CCTGAAGGTTACTGCCGAG     |
| pri-miR-429- forward  | CGGAGGCCACCCACACCA      |
| pri-miR-429- reverse  | GCGGATGGACGGTTTTAC      |
| pre-miR-10a-forward   | CTGTCTGTCTTCTGTA        |
| pre-miR-10a-reverse   | GAGCGGAGTGTTTAT         |
| pre-miR-21-forward    | ATGTTGACTGTTGAATCTCATGG |
| pre-miR-21-reverse    | TGTCAGACAGCCCATCGAC     |
| pre-miR-200a-forward  | TGTGAGCATCTTACCGGACA    |
| pre-miR-200a-reverse  | GGGTCACCTTTGAACATCGT    |
| pre-miR-200b-forward  | ACCCAGCTCGGGCAGCCGT     |
| pre-miR-200b-reverse  | TCTAGATGCGTGCAGGGCT     |
| pre-miR-200c-forward  | GAAGCTGCCTGACCCAAG      |
| pre-miR-200c-reverse  | CAGGGATCTGCAGCTTTTC     |
| pre-miR-141-forward   | GGCCGGCCCTGGGTCCATCT    |
| pre-miR-141-reverse   | CCACCCGGGAGCCATCTTTA    |
| GAPDH-forward         | AGCCACATCGCTCAGACAC     |
| GAPDH-reverse         | GCCAATACGACCAAATCC      |
| Human DDX1-forward    | TTGATGGGAAAGTTACCTACGG  |
| Human DDX1-reverse    | CAAGATGCAGGAAAGATGTCTG  |
| Mouse DDX1-forward    | AATGAAATGCAGCTACTTTCCG  |
| Mouse DDX1-reverse    | CTGTCTACATGACGTCAGAAGG  |
| Human Drosha-forward  | TGAAACACTATGATGACCACAG  |
| Human Drosha-reverse  | GATAAACCGTAACTCCTTCCAG  |
